# Supplementary material for: Landscape of FLT3 Variations Associated with Structural and Functional Impact on Acute Myeloid Leukemia: A Computational Study
Source: MDPI journal article supplement (doi:10.3390/ijms25063419), 2024-03-18
Supplement: s1 [file s1]

**Supplementary Table S1:** All variations listed in ClinVar for FLT3 having missense amino acid change – 86 single nucleotide variation and 3 deletion (<https://www.ncbi.nlm.nih.gov/clinvar>; accessed 31 January, 2024).

|     | <b>Protein change</b> | <b>Condition (s)</b>    | <b>Clinical Significance</b> |
|-----|-----------------------|-------------------------|------------------------------|
| 1.  | E991K                 | not specified           | -                            |
| 2.  | A988P                 | not provided            | benign                       |
| 3.  | P986L                 | not specified           | -                            |
| 4.  | R973Q                 | not provided            | Likely benign                |
| 5.  | S963L                 | not provided            | Likely benign                |
| 6.  | R961H                 | Inborn genetic diseases | Likely benign                |
| 7.  | R961C                 | Inborn genetic diseases | Uncertain significance       |
| 8.  | A953V                 | not specified           | -                            |
| 9.  | F906L                 | Inborn genetic diseases | Uncertain significance       |
| 10. | I881T                 | Inborn genetic diseases | Uncertain significance       |
| 11. | W872C                 | Inborn genetic diseases | Uncertain significance       |
| 12. | V852I                 | not provided            | Likely benign                |
| 13. | R845G                 | AML                     | Likely pathogenic            |
| 14. | Y842C                 | AML                     | Likely pathogenic            |
| 15. | Y842H                 | AML                     | Likely pathogenic            |
| 16. | N841K                 | AML                     | Likely pathogenic            |
| 17. | N841H                 | AML                     | Likely pathogenic            |
| 18. | D839G                 | AML                     | Likely pathogenic            |
| 19. | I836del               | AML                     | Likely pathogenic            |
| 20. | I836M                 | AML                     | Pathogenic                   |
| 21. | I836S                 | AML                     | Likely pathogenic            |
| 22. | I836F                 | AML                     | Likely pathogenic            |
| 23. | I836V                 | AML                     | Likely pathogenic            |
| 24. | I836L                 | AML                     | Pathogenic                   |
| 25. | D835E                 | AML                     | Pathogenic                   |
| 26. | D835del               | AML                     | Pathogenic/Likely pathogenic |
| 27. | D835F                 | AML                     | Likely pathogenic            |
| 28. | D835A                 | AML                     | Pathogenic                   |
| 29. | D835V                 | AML, ALL                | Pathogenic                   |
| 30. | D835Y                 | AML, ALL                | Pathogenic                   |
| 31. | D835N                 | AML                     | Pathogenic                   |
| 32. | D835H                 | AML                     | Pathogenic                   |
| 33. | C828R                 | Inborn genetic diseases | Uncertain significance       |
| 34. | M737I                 | AML                     | not provided                 |
| 35. | K709T                 | Inborn genetic diseases | Uncertain significance       |
| 36. | F691L                 | AML                     | Likely pathogenic            |
| 37. | I687F                 | AML                     | Likely pathogenic            |
| 38. | S684P                 | not specified           | -                            |
| 39. | N676K                 | AML                     | Likely pathogenic            |
| 40. | N676D                 | AML                     | Likely pathogenic            |
| 41. | E672K                 | Inborn genetic diseases | Uncertain significance       |
| 42. | K663Q                 | AML                     | Likely pathogenic            |
| 43. | D651G                 | AML                     | Likely pathogenic            |
| 44. | G619C                 | AML                     | Likely pathogenic            |
| 45. | F594L                 | AML                     | Likely pathogenic            |
| 46. | D593del               | ALL                     | Pathogenic                   |
| 47. | V592A                 | AML                     | Likely pathogenic            |
| 48. | Y591C                 | AML                     | Likely pathogenic            |
| 49. | Y591D                 | AML                     | Likely pathogenic            |
| 50. | V579A                 | AML                     | Likely pathogenic            |

|     |       |                         |                        |
|-----|-------|-------------------------|------------------------|
| 51. | Y572C | AML                     | Likely pathogenic      |
| 52. | Y572H | Multiple myeloma        | Likely pathogenic      |
| 53. | V557I | not provided            | Benign                 |
| 54. | N541S | Inborn genetic diseases | Likely benign          |
| 55. | I507V | not provided            | Likely benign          |
| 56. | S504R | Inborn genetic diseases | Uncertain significance |
| 57. | G493V | Inborn genetic diseases | Uncertain significance |
| 58. | T475P | not provided            | Likely benign          |
| 59. | S461F | Inborn genetic diseases | Uncertain significance |
| 60. | M430I | Inborn genetic diseases | Uncertain significance |
| 61. | K429T | Inborn genetic diseases | Uncertain significance |
| 62. | I417L | not provided            | Benign                 |
| 63. | Q394R | not specified           | not provided           |
| 64. | I361T | Inborn genetic diseases | Uncertain significance |
| 65. | D358V | not provided            | Benign                 |
| 66. | S356N | Inborn genetic diseases | Uncertain significance |
| 67. | D324N | not specified           | Likely benign          |
| 68. | V317E | Inborn genetic diseases | Uncertain significance |
| 69. | N306H | Inborn genetic diseases | Uncertain significance |
| 70. | G295D | Inborn genetic diseases | Uncertain significance |
| 71. | A291P | Inborn genetic diseases | Uncertain significance |
| 72. | G282R | not specified           | not provided           |
| 73. | F281L | Inborn genetic diseases | Uncertain significance |
| 74. | N278T | not specified           | not provided           |
| 75. | V275I | Inborn genetic diseases | Uncertain significance |
| 76. | L262F | not specified           | not provided           |
| 77. | L257W | Inborn genetic diseases | Uncertain significance |
| 78. | R243K | not provided            | Likely benign          |
| 79. | T227M | not provided            | Benign                 |
| 80. | Q202R | not specified           | not provided           |
| 81. | V194M | not provided            | Benign                 |
| 82. | K175R | Inborn genetic diseases | Uncertain significance |
| 83. | N151S | not specified           | not provided           |
| 84. | P116R | not provided            | Likely benign          |
| 85. | D84G  | Inborn genetic diseases | Uncertain significance |
| 86. | G64R  | not specified           | not provided           |
| 87. | I38N  | Inborn genetic diseases | Uncertain significance |
| 88. | V16L  | not provided            | Likely benign          |
| 89. | D7G   | not provided            | Benign                 |
